# Supplementary material
Source: MDPI journal article supplement (https://www.mdpi.com/2227-9040/4/3/11)
Supplement: s1 [file s1]

# Supplementary Materials: Simultaneous Determination of the Main Peanut Allergens in Foods Using Disposable Amperometric Magnetic Beads-Based Immunosensing Platforms

Víctor Ruiz-Valdepeñas Montiel, Rebeca Magnolia Torrente-Rodríguez, Susana Campuzano, Alessandro Pellicanò, Ángel Julio Reviejo, Maria Stella Cosio and José Manuel Pingarrón

**Table S1.** Optimized experimental variables affecting the performance of the electrochemical dual MBs-based immunosensing platform for the simultaneous determination of Ara h 1 and Ara h 2.

| Variable                             | Selected Value |          |
|--------------------------------------|----------------|----------|
|                                      | Ara h 1        | Ara h 2  |
| HOOC-MBs, $\mu\text{L}$              | 3.0            | 3.0      |
| [AbC], $\mu\text{g/mL}$              | 25.0           | 50.0     |
| [AbD], Dilution                      | 1/10,000       | 1/1000   |
| [Strep-HRP], Dilution                | 1/1000         | -        |
| [F(ab') <sub>2</sub> -HRP], Dilution | -              | 1/10,000 |
| AbC incubation time, min             | 30             |          |
| Antigen incubation time, min         | 45             |          |
| AbD incubation time, min             | 45             |          |
| Labeling incubation time, min        | 30             |          |

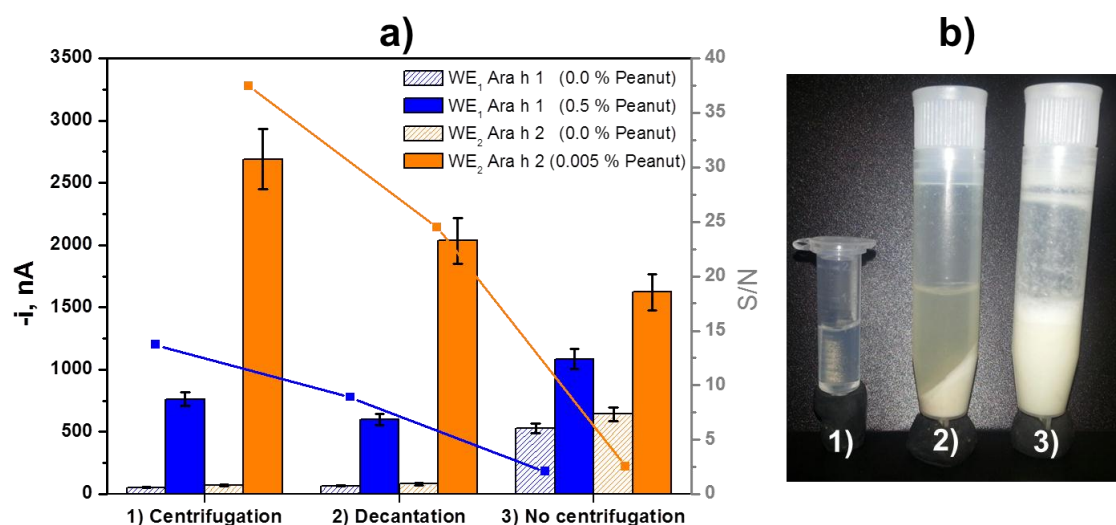

**Figure S1.** (a) Current values measured with the dual immunosensing platform from extracts prepared with unspiked and spiked with 0.5 (Ara h 1) and 0.005 (Ara h 2) % (*w/w*) wheat flour using different sample treatments: protocol described in Section 2.4 (1); centrifugation steps were substituted by a 30-min natural decantation process (2); centrifugation steps were omitted (3). (b) Real picture of the extracts obtained after applying each sample treatment. Supporting electrolyte, 0.05 M sodium phosphate solution, pH 6.0;  $E_{\text{app}} = -0.20$  V vs. Ag pseudo-reference electrode. Error bars estimated as triple of the standard deviation ( $n = 3$ ).
